# Supplementary material
Source: PubMed Central journal article supplement (PMC3837872)
Supplement: AAC.01472-13_zac012132391so1.pdf [file AAC.01472-13_zac012132391so1.pdf]

1 Supplemental Material for:

2

3 IreB, A Ser/Thr kinase substrate influences antimicrobial resistance in *Enterococcus*

4 *faecalis*

5

6 Cherisse L. Hall<sup>1,2</sup>, Michael Tschannen<sup>3</sup>, Elizabeth A. Worthey<sup>3,4</sup>, and Christopher J.

7 Kristich<sup>1,2,#</sup>

8

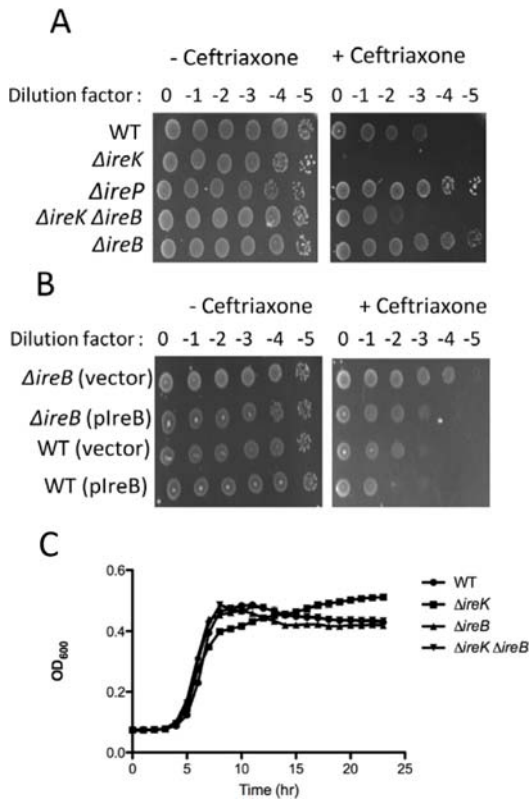

9

10 **Figure S1. IreB negatively regulates expression of cephalosporin resistance in *E.***

11 *faecalis*. **A.** Overnight cultures of *E. faecalis* strains were subjected to 10-fold serial

12 dilution and inoculated (left to right) on MHB agar plates containing either 0 or 20  $\mu\text{g}/\text{mL}$

13 ceftriaxone with incubation at 37°C overnight. Strains: WT, OG1RF;  $\Delta ireK$ , CK119;

14  $\Delta ireP$ , CK121;  $\Delta ireK \Delta ireB$ , CK167;  $\Delta ireB$ , CK164. **B.** Overnight cultures of plasmid-

15 bearing *E. faecalis* strains were subjected to 10-fold serial dilution and inoculated on

16 MHB agar containing chloramphenicol and either 0  $\mu\text{g}/\text{mL}$  or 50  $\mu\text{g}/\text{mL}$  ceftriaxone with

17 incubation at 37°C overnight. Strains are in panel (A). Plasmids: vector, pCI3340; pIreB,

18 pCJK187. **C.** Analysis of growth kinetics in hBHI was performed with overnight

19 cultures diluted 10,000 fold and growth was monitored by optical density at 600 nm

20 measured using Bioscreen C plate reader (Oy Growth Curves Ab, Ltd) under static

21 conditions. Strains were as in panel (A).

23

24

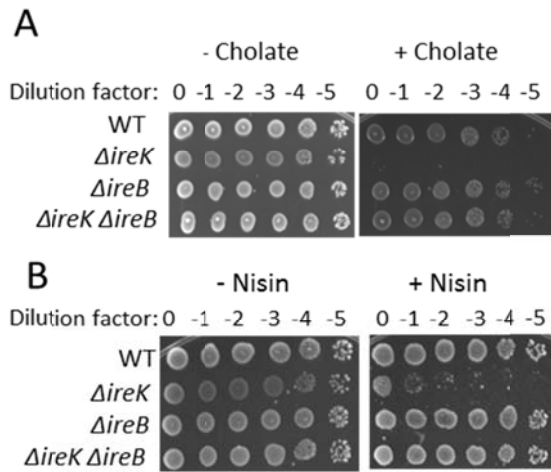

25

27 **Figure S2 IreB has a negative regulatory role in IreK-mediated responses to**

28 **additional stresses that act on the cell envelope in *E. faecalis*.**

31 Overnight cultures were subjected to 10-fold serial dilutions and inoculated on MHB agar

32 plates (left to right) with or without 5% sodium cholate from sheep bile (A) or 15  $\mu\text{g}/\text{mL}$

33 nisin (B). Plates were incubated overnight at 37°C. Strains: WT, OG1RF;  $\Delta ireK$ , CK119;

34  $\Delta ireK \Delta ireB$ , CK167;  $\Delta ireB$ , CK164.

32

33

34

35

36

37

38

39

40

41

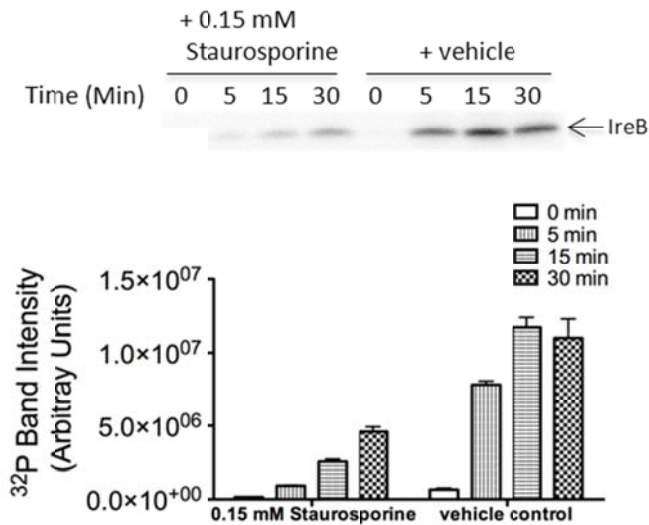

42

50 **Figure S3 Staurosporine inhibits IreK-n kinase activity *in vitro*.** Kinase assays were  
51 performed with 33 nM IreK-N, 14.2  $\mu$ M IreB in kinase buffer containing 0.5 mM 1  $\mu$ Ci  
52 [ $\gamma$ -<sup>32</sup>P]ATP and either 0.15 mM staurosporine or equivalent volume of vehicle (DMSO).  
53 Reactions were incubated at 37°C and aliquots were removed at indicated times. SDS  
54 sample buffer was added to stop reactions before analysis on SDS-PAGE. Radiolabelled  
55 proteins were visualized by autoradiography. The gel image is representative of three  
56 independent experiments, while the graph represents the mean and SEM of three  
57 independent experiments.

51

52

53
